1 Title: Oposonin-free, real-time imaging of *Cryptococcus neoformans* capsule during budding

2

3 Authors: Hugo Costa Paes<sup>a</sup>, Stefânia de Oliveira Frazão<sup>b</sup>, Camila Pereira Rosa<sup>c</sup>, Patrícia

4 Albuquerque<sup>d</sup>, Arturo Casadevall<sup>e</sup>, Maria Sueli Soares Felipe<sup>b,c</sup>, André Moraes Nicola<sup>a,c\*</sup>

5 <sup>a</sup> Faculty of Medicine, University of Brasília, Brasília, DF, Brazil.

6 <sup>b</sup> Intitute of Biological Sciences, University of Brasília, Brasília, DF, Brazil.

7 <sup>c</sup> Catholic University of Brasília, Brasília, DF, Brazil.

8 <sup>d</sup> Faculty of Ceilândia, University of Brasília, Brasília, DF, Brazil.

9 <sup>e</sup> Department of Molecular Microbiology and Immunology, Johns Hopkins Bloomberg  
10 School of Public Health, Johns Hopkins University, Baltimore, MD, USA.

11 \*Corresponding author

12 **Correspondence:**

13 André Moraes Nicola

14 Laboratório de Imunologia Celular, Faculdade de Medicina, Universidade de Brasília.

15 Campus Universitário Darcy Ribeiro, Faculdade de Medicina, sala BC-103. Brasília, DF,

16 Brazil, 70910-900.

17 Tel.: +55 61 98581-0129, Fax: +55 61 3349-8411 E-mail: [amnicola@unb.br](mailto:amnicola@unb.br)

18 **Keywords:** *Cryptococcus*, capsule, differential interference microscopy, budding, cell cycle

19 **List of abbreviations and acronyms**

20 CSF – Cerebrospinal fluid

21 DIC - Differential interference microscopy

22 NA – Numerical aperture

23 CCD – Charge-coupled device

24 MM – Minimal medium

25 CIM – CO<sub>2</sub>-independent medium

26 MOPS - 3-Morpholinopropane-1-sulfonic acid

27 SD – Standard deviation

28

29 **Abstract**

30 *Cryptococcus neoformans* is a unicellular fungal pathogen that causes meningoencephalitis,  
31 killing hundreds of thousands of patients each year. Its most distinctive characteristic is a  
32 polysaccharide capsule that envelops the whole cell. It is the major virulence attribute and the  
33 antigen for serologic diagnosis. We have developed a method for easy observation of the  
34 capsule and its growth dynamics using the cell-separation reagent Percoll and differential  
35 interference contrast (DIC) microscopy. Percoll suspension is far less disruptive of cell  
36 physiology than methods relying on antibody binding to the capsule, and measurements made  
37 with it are equivalent with India ink. Time-lapse microscopy observations using this method  
38 suggest that during budding, a dividing cell can regulate whether the capsule polysaccharide  
39 it produces is deposited on the capsule of the bud or on its own. This observation has  
40 important implications for our understanding of the *C. neoformans* capsule induction process  
41 during budding.

42 **Manuscript text**

43 *Cryptococcus neoformans*, the most important agent of fungal meningitis, produces a thick  
44 polysaccharide capsule, one of its main virulence factors. This structure envelops the yeast  
45 cell, protects it from phagocytosis and has immunomodulatory properties that favor  
46 progression of the infection. The capsule is also the morphological signature of the  
47 *Cryptococcus* genus: the detection of yeast cells surrounded by a polysaccharide layer in  
48 cerebrospinal fluid (CSF) from patients is a standard procedure for diagnosis of  
49 cryptococcosis. For visualizing the capsule, the most common procedure is the India ink test:  
50 the CSF sample is mixed with a small amount of ink and a droplet of the resulting suspension  
51 is observed on a glass slide under a light microscope. The India ink particles form a dark  
52 background that reveals the light-permeant capsule around yeast cells by contrast (figure 1A).  
53 India ink staining is simple, cheap and quick, and a commonly used standard for researchers  
54 who wish to visualize the capsule.

55 Despite its usefulness as a diagnostic technique, the India ink procedure has a major  
56 disadvantage for capsule research: commercial vendors add preservatives, such as thimerosal,  
57 to the ink preparation. This makes India ink formulations toxic for *C. neoformans* and only  
58 useful for static observations of the capsule. Consequently, India ink preparations cannot be  
59 used to document capsule formation in real time and, as a result, important aspects of the  
60 synthesis of this key virulence factor may escape observation. Some strategies have been  
61 used in the past to circumvent this limitation. *C. neoformans* capsules labelled with  
62 monoclonal antibodies<sup>1</sup> or complement<sup>2</sup> were incubated in capsule-inducing conditions and at  
63 specific time points during induction the probes were detected using fluorescence microscopy.  
64 More recently, the Quellung reaction observed on differential interference microscopy (DIC),  
65 which produces a change in refractive index when antibodies bind to the capsule<sup>3, 4</sup>, was used  
66 to monitor capsule thickening in *C. neoformans* cells in real time<sup>5, 6</sup>. These reports yielded

67 important insights into the kinetics of capsule synthesis, but all suffered from an important  
68 caveat: because antibodies and complement proteins interact directly with capsule  
69 components, they may change its physical properties, especially at the reasonably high  
70 concentrations needed for the observations. Indeed, antibody binding increases rigidity of the  
71 capsule to a point that can actually hinder budding of daughter cells<sup>7</sup> and it induces metabolic  
72 alterations in the fungal cell<sup>8</sup>. Hence, it is possible that these antibody effects affected the  
73 kinetics of capsule growth and there is a need for additional approaches to study capsule  
74 dynamics.

75 We hypothesized that a non-toxic suspension of particles with refractive index that is higher  
76 than that of the capsule would permit the observation of the capsule directly using DIC, as the  
77 particles would be excluded and create an optical path length gradient that generates contrast.  
78 We tested this hypothesis using Percoll, which consists of a 23% (w/w) aqueous suspension  
79 of colloidal silica particles (15-30 nm in diameter) coated with polyvinylpyrrolidone that is  
80 routinely used to form gradients for differential centrifugation of cells. As shown below,  
81 suspending *C. neoformans* cells in Percoll enabled us readily to observe the capsule as a well-  
82 defined halo around *C. neoformans* cells in high-resolution time-lapse DIC microscopy.

83 The microscopic observations were made on a Zeiss AxioObserver Z1 temperature-controlled  
84 inverted microscope equipped with 63X NA 1.4 oil immersion objective, DIC polarizers and  
85 prisms, motorized focus and an MRm cooled CCD camera (Carl Zeiss GmbH, Germany).

86 The images shown below were collected using the Zeiss ZEN software and manipulated  
87 using Adobe Photoshop CS6, Adobe Illustrator CS6 and ImageJ. No non-linear modifications  
88 were made to the original images. *C. neoformans* cells of the H99 reference strain were  
89 incubated in either Sabouraud dextrose broth or one of three capsule-inducing media: 1) MM  
90 - minimal medium<sup>9</sup> (29.4 mM KH<sub>2</sub>PO<sub>4</sub>, 10 mM MgSO<sub>4</sub>, 13 mM glycine, 3 μM thiamine, 15  
91 mM dextrose) 2) CIM - CO<sub>2</sub>-independent medium<sup>10</sup>; Thermo Fisher Scientific, Waltham,

92 MA, USA); 3) Sab-MOPS - Sabouraud broth diluted ten-fold with 50 mM 3-(N-  
93 Morpholino)propanesulfonic acid, pH 7.5<sup>11</sup>. All experiments were carried out at 37 °C.

94 Proof of principle observations of *C. neoformans* incubated in Sabouraud broth, MM or Sab-  
95 MOPS for 24 h confirmed that the capsule was clearly visible (figure 1A) and that  
96 measurements made with India ink and Percoll produced equivalent results (figure 1B).  
97 Interestingly, we were also able to observe an increase in cell body diameter in cells  
98 incubated in MM, as reported previously<sup>12</sup>. In these experiments, we mixed *C. neoformans*  
99 cultures with equal volumes of India ink or Percoll and mounted the suspensions on slides  
100 covered with 0.170 mm coverslips. To test whether Percoll was toxic to *C. neoformans*, we  
101 set up parallel cultures with and without Percoll for 84 h and estimated final cell densities on  
102 a hemocytometer: these were  $5.2 \times 10^7$  cells/ml (SD:  $3.9 \times 10^6$  cells/ml) and  $6.4 \times 10^7$  cells/ml  
103 (SD:  $1.3 \times 10^7$  cells/ml), respectively (p=0.2004). The results established that suspension in  
104 Percoll was not toxic for growth. We observed that the capsule edge was much sharper in  
105 Percoll suspension than in India ink suspension. Although the exact mechanism for this  
106 difference is not known, we suggest two explanations that are not mutually exclusive. First,  
107 India Ink is a preparation of particles with heterogeneous sizes and some of the smaller  
108 particles may be able to penetrate the domain of the capsule, especially given that outer layers  
109 are less dense<sup>2</sup>. Second, the capsule is a highly hydrated and hydrophilic structure that may  
110 not interact well with the polyvinylpyrrolidone thus creating a sharp exclusion zone. These  
111 encouraging results led us to set up experiments that would allow us to document capsule  
112 formation in real time by time-lapse microscopy.

113 For time-lapse imaging, we observed cells in capsule-inducing media supplemented with  
114 Percoll in a POCmini-2 cultivation system (PeCon GmbH, Germany), a closed chamber  
115 bounded by two 0.170 mm coverslips. In some experiments we observed that a large  
116 proportion of cells in a 50% Percoll suspension would float due to being less dense than the

117 medium. Thus, we enriched the suspension for denser cells by resuspending cells into a 50%  
118 Percoll suspension in water (v/v) and centrifuging at 2000 g for five minutes. The pellet  
119 containing cells that did not float was then counted and suspended at low density  
120 (approximately 1000 – 2000 cells per mL) in CIM or Sab-MOPS and supplemented with 50%  
121 (v/v) Percoll. MM is not suitable for time-lapse experiments because the mixture turned into  
122 a gel after prolonged incubation. Approximately 800  $\mu$ L of the resulting suspension were  
123 then added to the chamber, which was incubated in the microscope at 37 °C to allow  
124 collection of images every five to fifteen minutes for one to two days. The time-lapse images  
125 show that the capsule growth is more pronounced in Sab-MOPS, although it was readily  
126 observable in both capsule induction conditions (figures 2A and 2B and supplemental videos  
127 1-3). We measured the capsule size for several cells and found that the capsule growth  
128 follows sigmoidal kinetics with different rates for different cells (figure 2C), as previously  
129 observed using measurements based on the Quellung effect<sup>5,6</sup>.

130 In contrast to the studies using antibodies, however, we were clearly able to observe the  
131 capsule in nascent buds and follow its growth in daughter cells. The capsule measurements  
132 shown in figure 3A and plotted in figure 3B are from a cell that went through six budding  
133 events throughout the observation period. This cell is indicated in figure 2A by black arrows.  
134 The first three buds emerged during the phase in which the mother cell capsule was not  
135 growing; all three had capsules that were thicker than that of the mother cell and each one  
136 had a thicker capsule than the previous bud. The later buds, in contrast, emerged as the  
137 mother cell capsule was becoming thicker; their capsules were less thick than those of the  
138 mother cell and the previous buds. In contrast to this one cell, we observed several others  
139 whose buds had a thin capsule and no apparent pattern of capsule redistribution from their  
140 mother cell. These observations suggest that the destination of new capsular material  
141 synthesized by the mother cell – its own capsule or that of a bud – may not be stochastic. In a

142 zebrafish model of cryptococcal infection, *C. neoformans* cells with enlarged capsules  
143 effectively inhibited macrophage phagocytosis and caused more severe disease<sup>13</sup>. Capsular  
144 polysaccharide protects the cell from phagocytosis and free radical fluxes<sup>14</sup>. Thus, whether  
145 capsular material is destined to increase the size of the mother cell or the bud could define  
146 which of these cells escapes the immune response inside the host.

147 Another interesting pattern we observed in several (but as seen in figure 3 not all) budding  
148 cells on Sab-MOPS is of mother cells keeping their capsules at a constant thickness while  
149 budding and increasing it afterwards (figure 4). When we compare our data including buds to  
150 those of García-Rodas *et al.*<sup>6</sup>, at first glance they seem to be in agreement: while the mother  
151 cell is budding actively, and presumably spending only brief intervals in G1/S, its own  
152 capsule does not become thicker. Our data would seem to suggest that this is less because of  
153 an intrinsic impairment of capsule growth during G2/M, as suggested by the authors of that  
154 study, and more because a mechanism exists whereby capsule polysaccharide might be  
155 destined for the capsule of the daughter cell.

156 Comparing India ink staining and the method we describe here, we found that the former uses  
157 a cheaper reagent and requires a much simpler microscope for observation. However, India  
158 ink is not readily available everywhere and the quality of the reagent for capsule visualization  
159 varies widely among manufacturers. Despite its higher price, Percoll resulted in consistently  
160 successful observation of capsule by different researchers in our lab. More importantly, it  
161 allowed real-time observation of the capsule in live cells in the absence of exogenous protein  
162 binding to – and potentially interfering with – the capsule. Thus, while the need for a DIC-  
163 equipped microscope precludes its use in clinical diagnosis of cryptococcosis, we propose  
164 that Percoll could become the contrast agent of choice for research laboratories that have  
165 access to appropriate equipment.

166 In summary, we describe a new method for visualizing the capsule and studying capsular  
167 growth kinetics based on suspending cells in media with a very different refractive index than  
168 the capsule. Comparison of the insights obtained with this method relative to those learned  
169 with the Quellung method confirms that different cells grow at different rates. Perhaps most  
170 importantly, the Percoll method has provided new insights on the distribution of  
171 polysaccharide during budding that have important implications for our views on bud  
172 survival and antibody function.

173

#### 174 **Acknowledgments**

175 The authors would like to thank the Brazilian funding agencies Capes, CNPq and FAP-DF  
176 for research funding and scholarships.

#### 177 **References**

- 178 1. Pierini LM, Doering TL. Spatial and temporal sequence of capsule construction in  
179 *Cryptococcus neoformans*. Mol Microbiol 2001; 41:105-15.
- 180 2. Zaragoza O, Telzak A, Bryan RA, Dadachova E, Casadevall A. The polysaccharide  
181 capsule of the pathogenic fungus *Cryptococcus neoformans* enlarges by distal growth and is  
182 rearranged during budding. Mol Microbiol 2006; 59:67-83.
- 183 3. MacGill TC, MacGill RS, Casadevall A, Kozel TR. Biological correlates of capsular  
184 (quellung) reactions of *Cryptococcus neoformans*. J Immunol 2000; 164:4835-42.
- 185 4. Mukherjee J, Cleare W, Casadevall A. Monoclonal antibody mediated capsular  
186 reactions (Quellung) in *Cryptococcus neoformans*. J Immunol Methods 1995; 184:139-43.
- 187 5. Cordero RJ, Bergman A, Casadevall A. Temporal behavior of capsule enlargement by  
188 *Cryptococcus neoformans*. Eukaryot Cell 2013; 12:1383-8.



- 189 6. Garcia-Rodas R, Cordero RJ, Trevijano-Contador N, Janbon G, Moyrand F,  
190 Casadevall A, et al. Capsule growth in *Cryptococcus neoformans* is coordinated with cell  
191 cycle progression. MBio 2014; 5:e00945-14.
- 192 7. Cordero RJ, Pontes B, Frases S, Nakouzi AS, Nimrichter L, Rodrigues ML, et al.  
193 Antibody binding to *Cryptococcus neoformans* impairs budding by altering capsular  
194 mechanical properties. J Immunol 2013; 190:317-23.
- 195 8. McClelland EE, Nicola AM, Prados-Rosales R, Casadevall A. Ab binding alters gene  
196 expression in *Cryptococcus neoformans* and directly modulates fungal metabolism. J Clin  
197 Invest 2010; 120:1355-61.
- 198 9. Frases S, Pontes B, Nimrichter L, Viana NB, Rodrigues ML, Casadevall A. Capsule  
199 of *Cryptococcus neoformans* grows by enlargement of polysaccharide molecules. Proc Natl  
200 Acad Sci U S A 2009; 106:1228-33.
- 201 10. Ost KS, O'Meara TR, Huda N, Esher SK, Alspaugh JA. The *Cryptococcus*  
202 *neoformans* alkaline response pathway: identification of a novel rim pathway activator. PLoS  
203 Genet 2015; 11:e1005159.
- 204 11. Zaragoza O, Casadevall A. Experimental modulation of capsule size in *Cryptococcus*  
205 *neoformans*. Biol Proced Online 2004; 6:10-5.
- 206 12. Zaragoza O, Garcia-Rodas R, Nosanchuk JD, Cuenca-Estrella M, Rodriguez-Tudela  
207 JL, Casadevall A. Fungal cell gigantism during mammalian infection. PLoS Pathog 2010;  
208 6:e1000945.
- 209 13. Bojarczuk A, Miller KA, Hotham R, Lewis A, Ogryzko NV, Kamuyango AA, et al.  
210 *Cryptococcus neoformans* Intracellular Proliferation and Capsule Size Determines Early  
211 Macrophage Control of Infection. Scientific reports 2016; 6:21489.
- 212 14. Zaragoza O, Chrisman CJ, Castelli MV, Frases S, Cuenca-Estrella M, Rodriguez-  
213 Tudela JL, et al. Capsule enlargement in *Cryptococcus neoformans* confers resistance to

214 oxidative stress suggesting a mechanism for intracellular survival. Cell Microbiol 2008;  
215 10:2043-57.

216

## 217 **Figure legends**

218

### 219 **Figure 1 – Comparison between DIC imaging with Percoll and India ink staining**

220 *C. neoformans* cells were incubated in two different capsule-inducing conditions (MM and  
221 Sab-MOPS) and in non-inducing Sabouraud medium for 24 h prior to imaging with the  
222 method we describe and the standard India ink staining. Panel A shows representative images,  
223 whereas panel B shows that capsule thickness measurements yield similar results with both  
224 methods. The scale bar in A equals 5  $\mu\text{m}$ . The lines in B represent the mean capsule thickness  
225 of 20 individual cells. The p-values shown in B were calculated by the Kolmogorov-Smirnov  
226 test comparing measurements with India ink and Percoll.

227

### 228 **Figure 2 – Time-lapse imaging of *C. neoformans* capsule growth in inducing medium** 229 **(Sab-MOPS)**

230 *C. neoformans* cells were incubated in Sab-MOPS supplemented with 50% Percoll and  
231 imaged every 10 minutes by DIC microscopy. The images that were used to make this figure  
232 were compiled in supplemental video 1. Panel A shows some of the images, with a 60-minute  
233 interval between each image. The arrows point to the same cell at different time points; this  
234 cell was used to make figures 2B and 3B. Panel B shows the capsule thickness measured  
235 every 30 minutes and the line represents an asymmetric sigmoidal curve that was fit to the  
236 data ( $r^2 = 0.98$ ). In panel C, capsule volume was calculated at several time points for seven

237 different cells using cell body and capsule diameter measurements from micrographs as  
238 described in the text. Curves were fitted to the values using the Gompertz growth curve  
239 model in Graphpad Prism 6 (adjusted  $r^2$  values shown). The curves generated for each dataset  
240 were compared to test for variation in the slope ( $k$ ) and the preferred model, with a  
241 probability greater than 99.99%, was found to be that  $k$  is different for each curve. Gaps in  
242 some curves correspond to periods in the time series when the cells drifted out of focus,  
243 making it impossible to perform measurements.

244

245 **Figure 3 – Comparison between the capsule thicknesses of one mother cell and it**  
246 **multiple buds**

247 Panel A shows the same mother cell indicated by arrows on figure 2A, which appears  
248 supplemental video 1, but at the specific time points in which each of six successive buds  
249 (arrows) can first be seen to be completely separated from the mother cell. The actual images,  
250 capsule measurements and how much time had elapsed after the cells were transferred to  
251 capsule inducing media are indicated in the figure. In panel B, the bud capsule sizes are  
252 plotted into a zoomed-in version of the curve shown in figure 2B, which shows capsule  
253 growth kinetics for the mother cell.

254

255 **Figure 4 – Capsule thicknesses of four mother cells and their buds**

256 Panels A-D show the capsule thickness of four mother cells and their buds. The arrows point  
257 to the first time point in which the bud can first be seen emerging in the cell wall of its  
258 mother cell, whereas the star indicates the bud's capsule thickness at the first time point in  
259 which its cell wall has clearly separated from that of its mother cell.

260

261 **Captions for the supplementary videos**

262

263 **Supplementary video 1 – Capsule growth in Sab-MOPS**

264 *C. neoformans* cells were re-suspended in capsule-inducing medium (Sab-MOPS) supplemented with  
265 50% Percoll and imaged every 10 min for 40 h. The time-lapse images were then cropped and  
266 compiled into a video. Still images from this video are shown in figure 2A, and several details of one  
267 of the cells in this video (along with its buds) are shown in figures 2B, 3A and 3B.

268

269 **Supplementary video 2 – Capsule growth in CIM**

270 *C. neoformans* cells were re-suspended in capsule-inducing medium (CIM) supplemented with 50%  
271 Percoll and imaged every 5 min for a total period of 23 h.

272

273 **Supplementary video 3 – Capsule growth in CIM**

274 *C. neoformans* cells were re-suspended in capsule-inducing medium (CIM) supplemented with 50%  
275 Percoll and imaged every 5 min for a total period of 23 h.

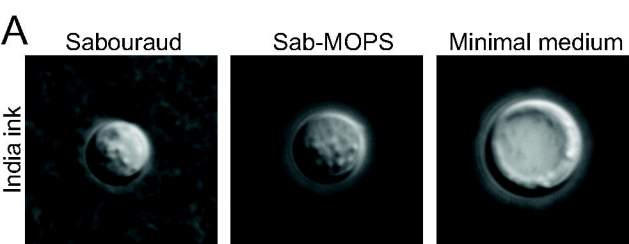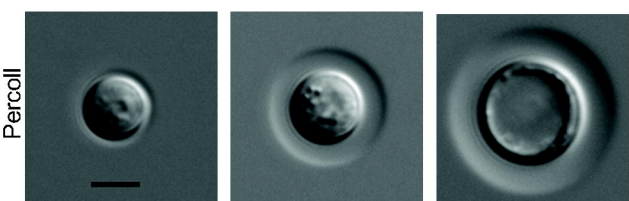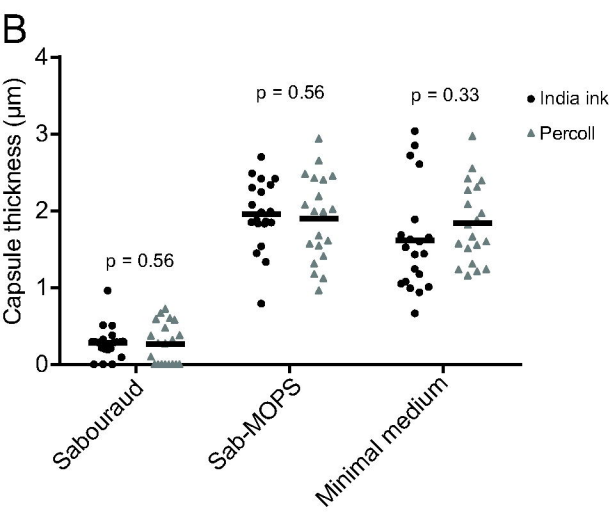

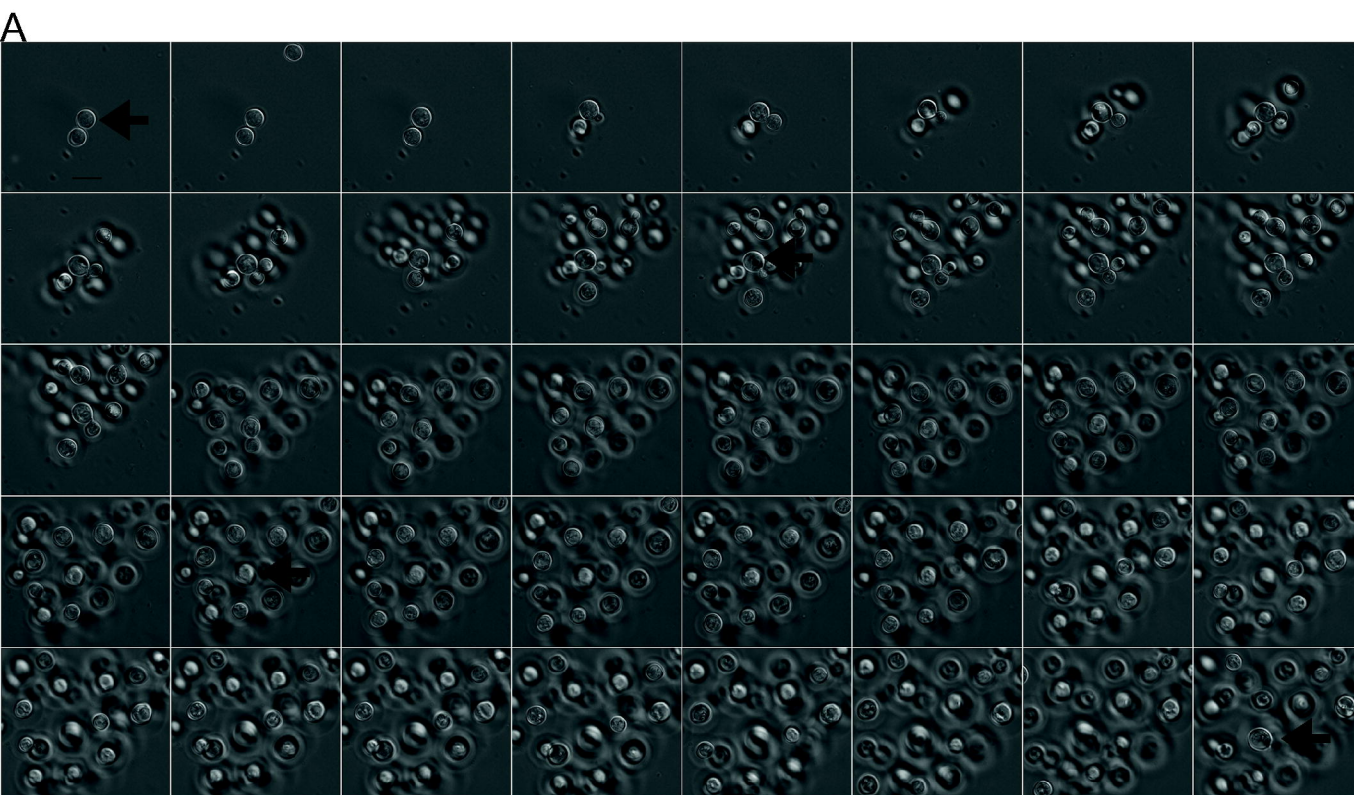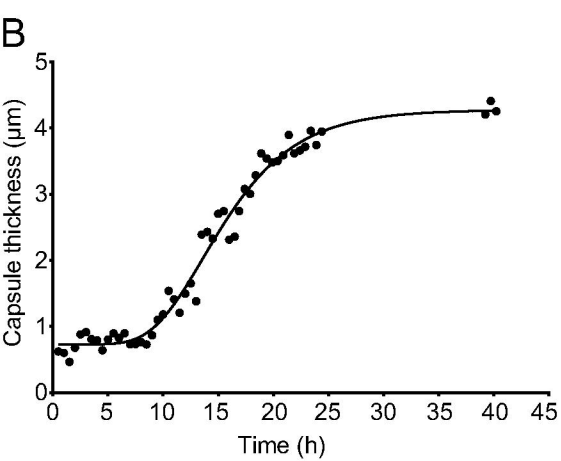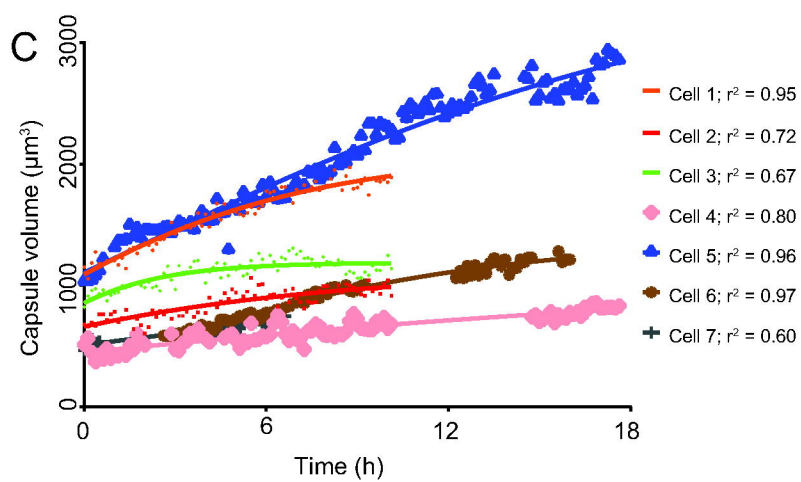

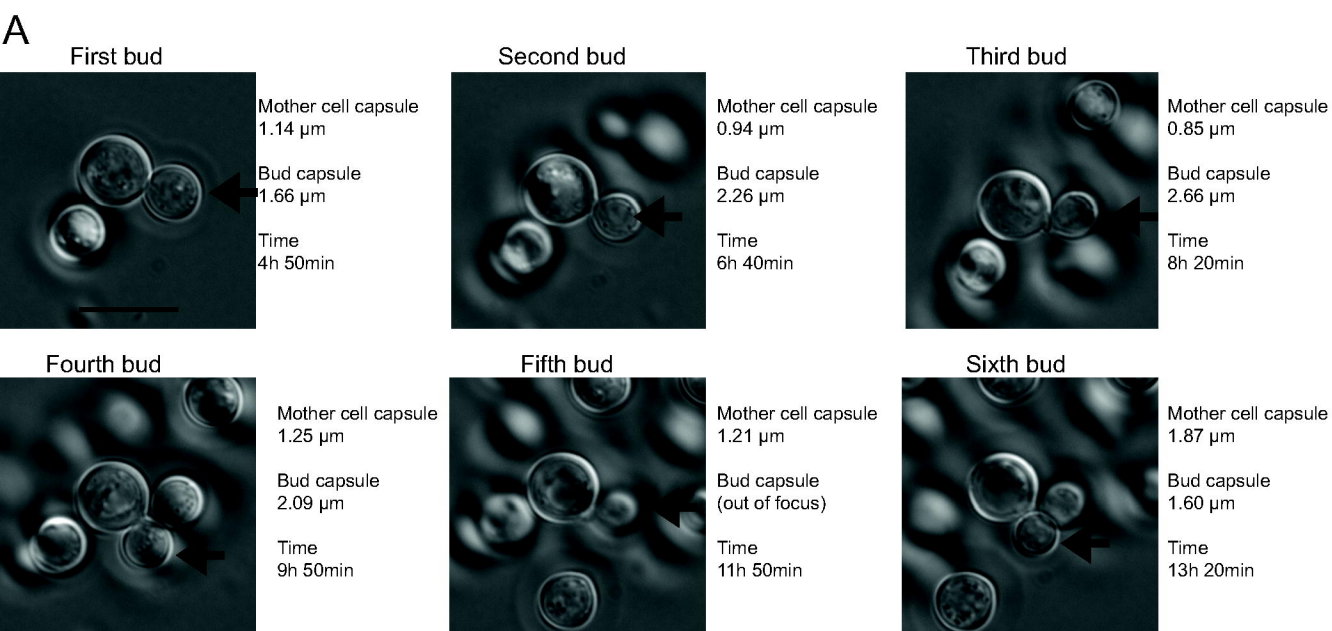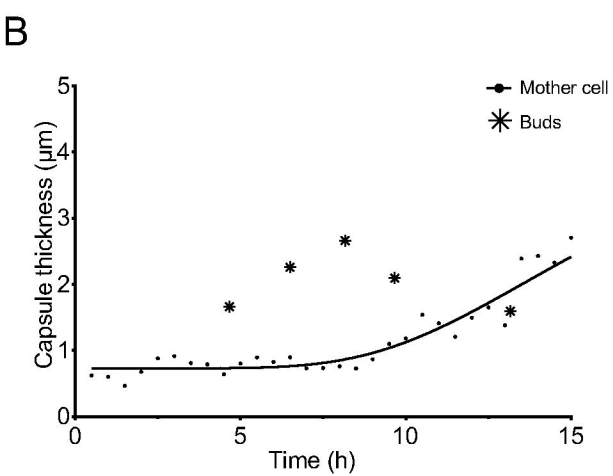



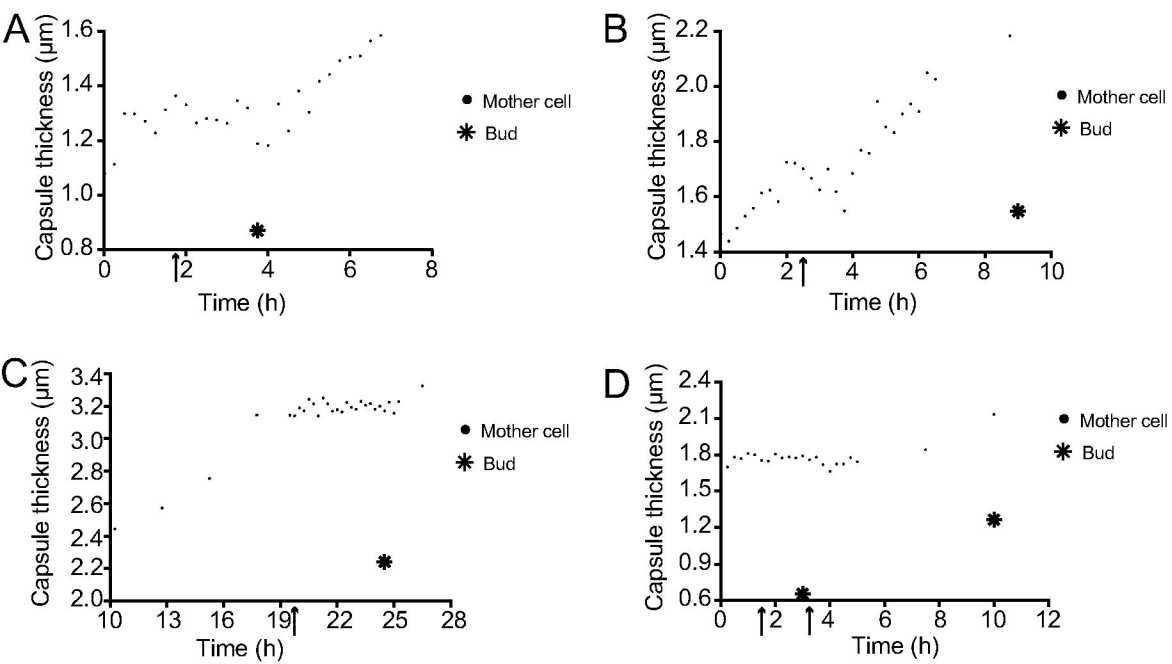

Source: https://www.biorxiv.org/content/10.1101/313429v1.full.pdf
